# Supplementary material for: AISO: Annotation of Image Segments with Ontologies
Source: Springer Nature journal article supplement (doi:10.1186/2041-1480-5-50), 2014-12-01
Supplement: 13326_2014_192_MOESM1_ESM.pdf [file 13326_2014_192_MOESM1_ESM.pdf]

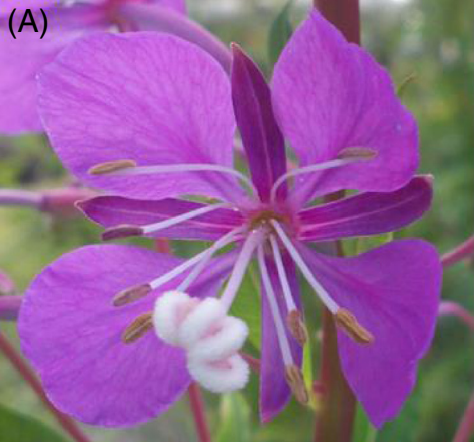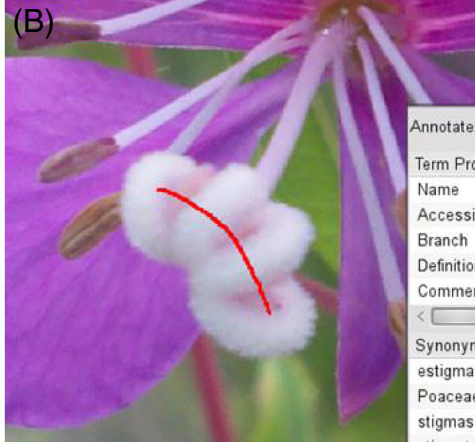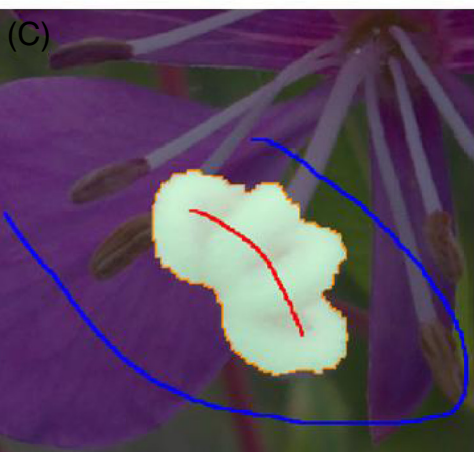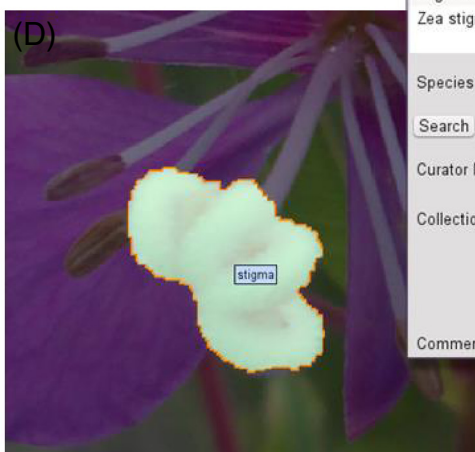

(E)

Annotate: stigma

| Term Property | Value                            |
|---------------|----------------------------------|
| Name          | stigma                           |
| Accession ID  | PO:0009073                       |
| Branch        | Plant Anatomy                    |
| Definition    | A cardinal organ part that is p  |
| Comment       | If you are annotating to this st |

Synonyms

- estigma (Spanish)
- Poaceae stigma
- stigmas
- stigmata
- Zea stigma

**PO Web Service**

Species Name: Chamerion angustifolium

**uBio**

Curator Name: Chris Curator

Collection Id: 1|

Sample annotation of a fireweed image.

Comments
