# Supplementary material for: AISO: Annotation of Image Segments with Ontologies
Source: Springer Nature journal article supplement (doi:10.1186/2041-1480-5-50), 2014-12-01

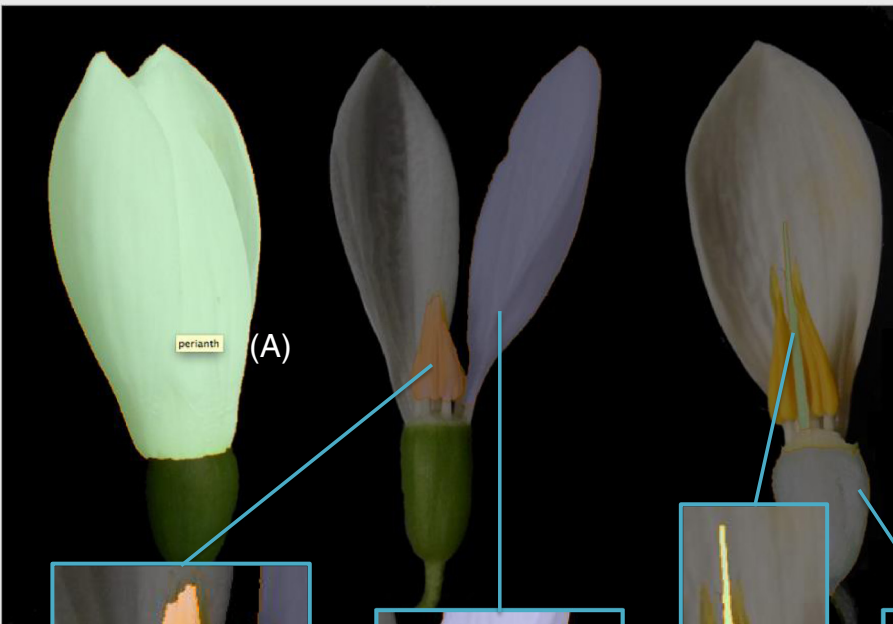

| Term Property | Value                                        |
|---------------|----------------------------------------------|
| Name          | perianth                                     |
| Accession ID  | PO:0009058                                   |
| Branch        | Plant Anatomy                                |
| Definition    | A collective phyllome structure (PO:002502)  |
| Comment       | The perianth can consist of only the corolla |

| Synonyms           |  |
|--------------------|--|
| adnate perianth    |  |
| calyptra perianth  |  |
| connate perianth   |  |
| 花萼、花被 (Japanese)   |  |
| perianto (Spanish) |  |

Species Name: Galanthus elwesii

Search

Curator Name: Dennis Stevenson

Collection Id

Annotated by  
Laura Moore

Comments

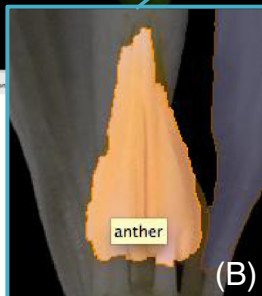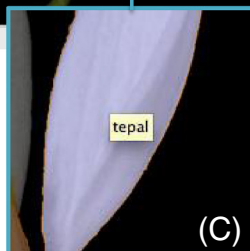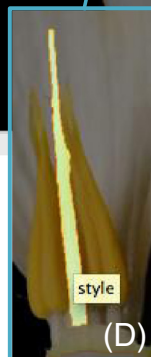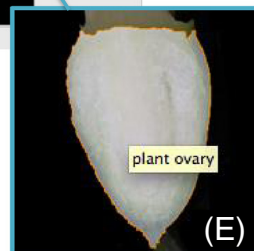

Supplement: 13326_2014_192_MOESM2_ESM.pdf [file 13326_2014_192_MOESM2_ESM.pdf]
