# Supplementary material for: AISO: Annotation of Image Segments with Ontologies
Source: Springer Nature journal article supplement (doi:10.1186/2041-1480-5-50), 2014-12-01
Supplement: 13326_2014_192_MOESM3_ESM.pdf [file 13326_2014_192_MOESM3_ESM.pdf]

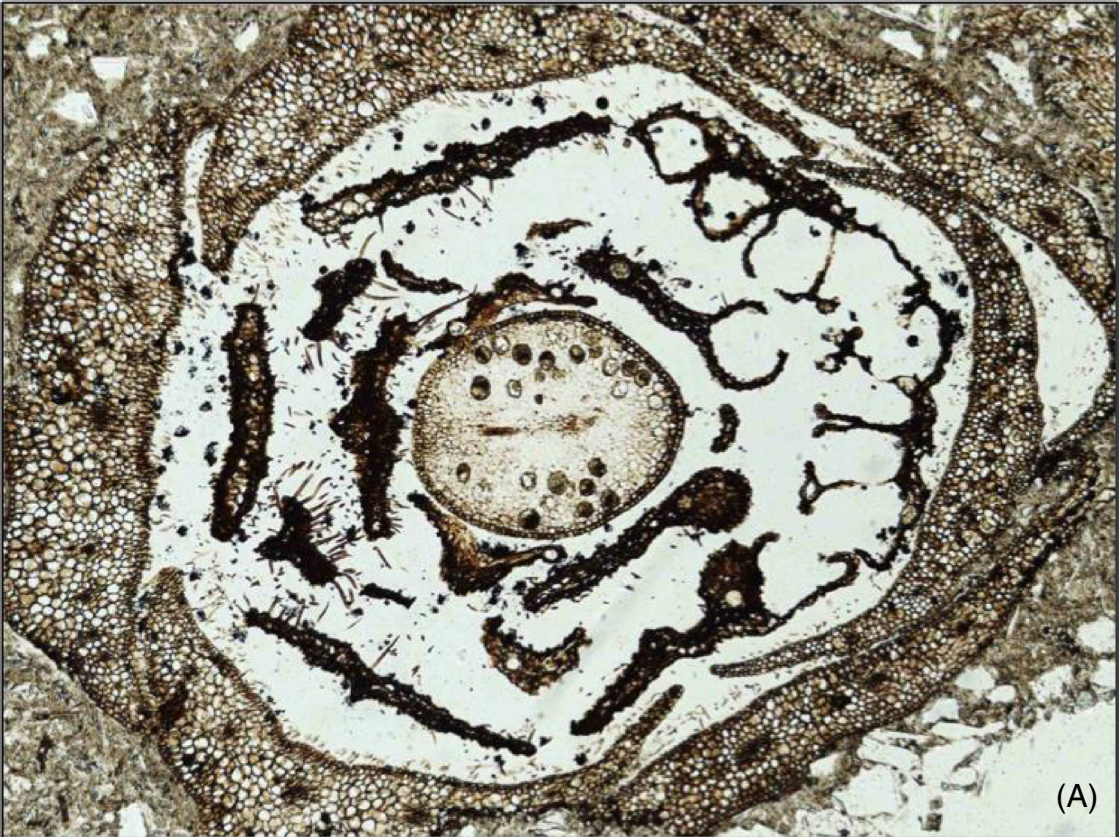

(A)

Segmentation Mode: **Labeling Mode** Form segment

View: **Combined** Annotate: **stamen [PO:0009029]** Assi

**stamen**

**carpel**

**tepal**

| Term Property | Value                                            |
|---------------|--------------------------------------------------|
| Name          | stamen                                           |
| Accession ID  | PO:0009029                                       |
| Branch        | Plant Anatomy                                    |
| Definition    | A microsporophyll bearing one or more microspora |
| Comment       | Part of tassel floret.                           |

Synonyms

- estambre (Spanish)
- Poaceae stamen
- Zea stamen
- 雄蕊 (Japanese)

Species Name: **Lauraceae species**

Search

Curator Name: **Brian Atkinson**

Collection Id: **AW 641 G Top, #3**

Comments: **Lauraceae flower cross section showing carpel, stamen, and tepals**

(B)
